# Supplementary material for: Development of site-specific antibody-conjugated immunoliposomes for sensitive detection of disease biomarkers
Source: Royal Society of Chemistry journal article supplement (doi:10.1039/d1nr04659d), 2021-01-01
Supplement: d1nr04659d1.pdf [file d1nr04659d1.pdf]

**Development of site-specific antibody-conjugated immunoliposomes for sensitive  
detection of disease biomarkers**

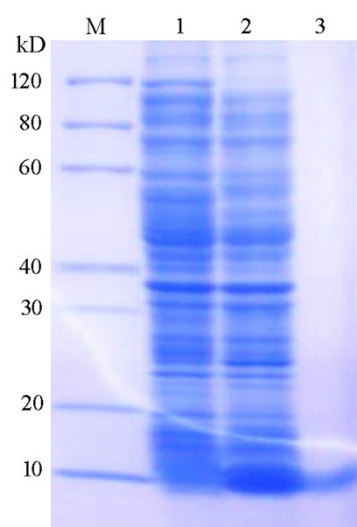

**Fig. S1** 15% SDS-PAGE assay. Lane 1 shows *E. coli* BL21 (DE3) cells. Lane 2 shows *E. coli* BL21 (DE3) cells harboring pZ<sub>TAG</sub>-Histag and pEVOL-pBpF plasmids cultured LB medium containing Bpa. Lane 3 shows the purified Z<sub>Bpa</sub>-Histag by Ni<sup>2+</sup> affinity chromatography.

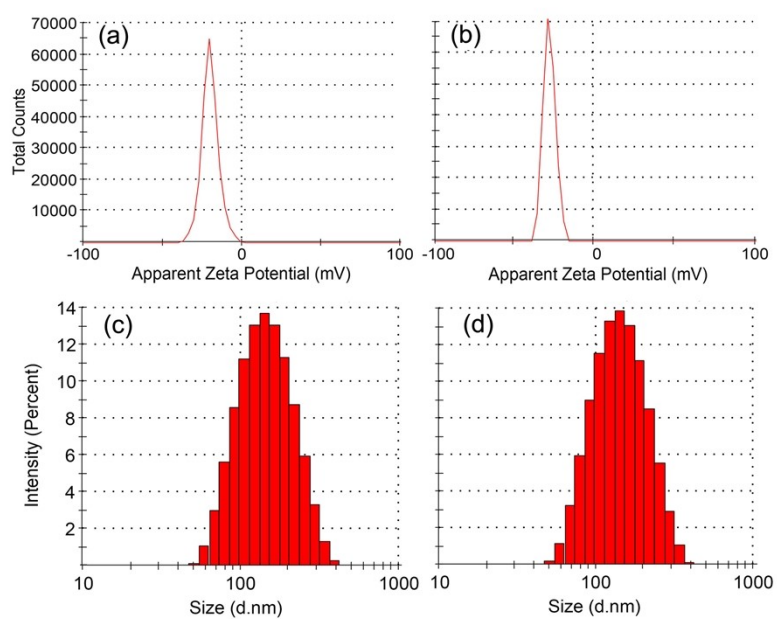

**Fig. S2** Zeta potential and size distributions of IgG-Z-His@HRP-liposomes (a and c) and IgG@HRP-liposomes (b and d).

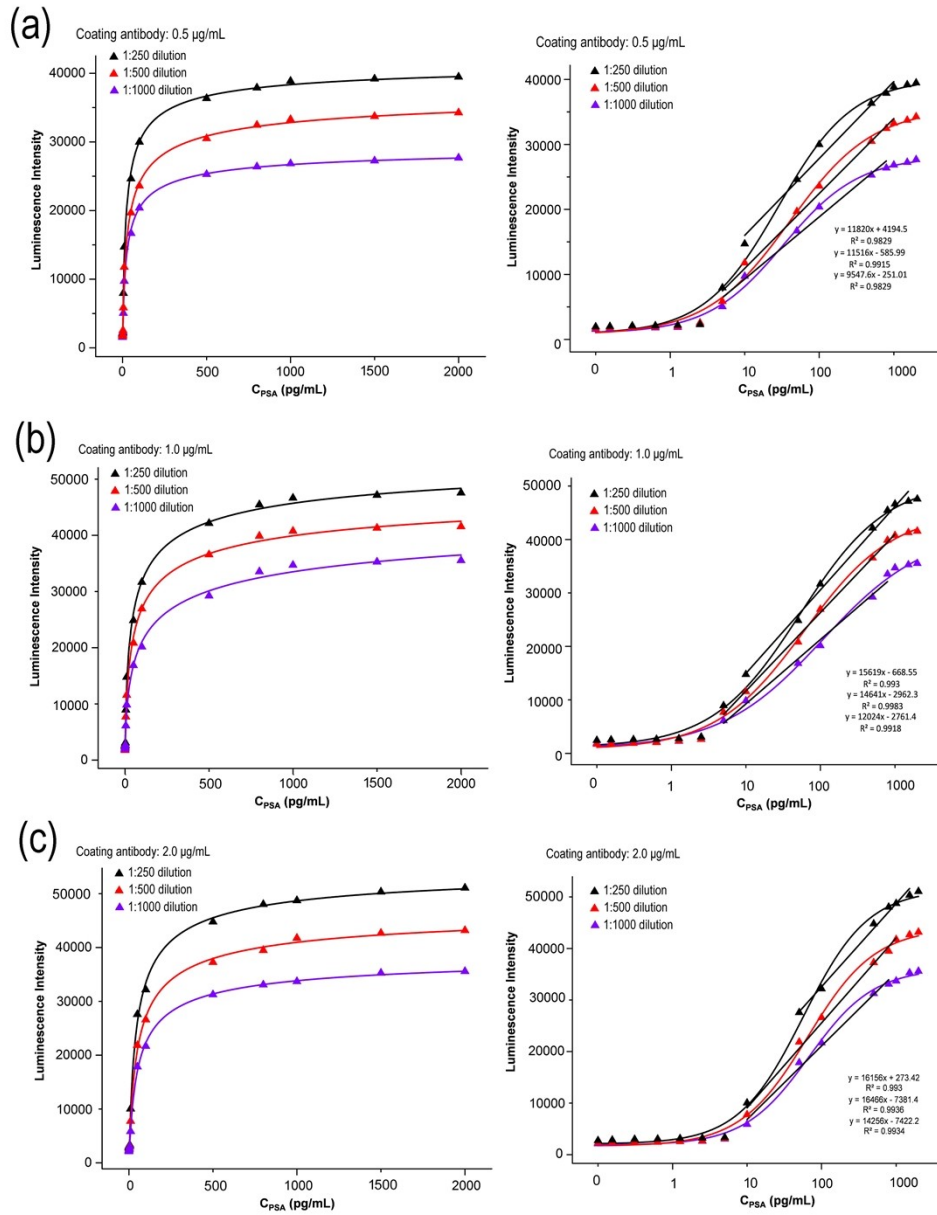

**Fig. S3-1** Optimization of the experimental conditions for PSA detection. (a), (b), and (c) show IgG@HRP-liposomes for PSA detection, (d), (e), and (f) show IgG-\*Z-His@HRP-liposomes for PSA detection. The response curve of intensities versus PSA concentrations are shown in left, and the calibration curve of intensities versus PSA concentrations are shown in right.

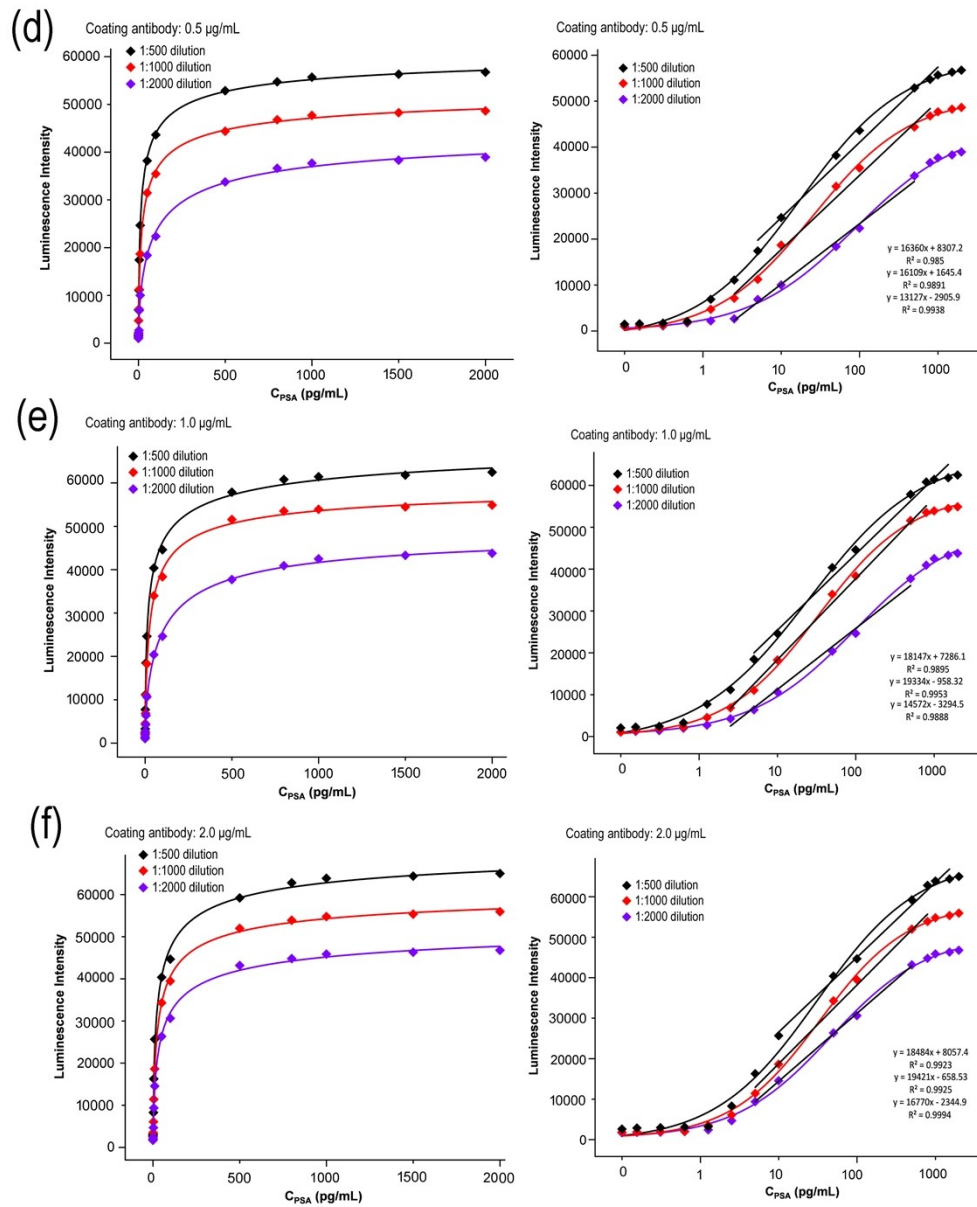

**Fig. S3-2** Optimization of the experimental conditions for PSA detection. (a), (b), and (c) show IgG@HRP-liposomes for PSA detection, (d), (e), and (f) show IgG-\*Z-His@HRP-liposomes for PSA detection. The response curve of intensities versus PSA concentrations are shown in left, and the calibration curve of intensities versus PSA concentrations are shown in right.

Supplementary Information

**Table S1** The DNA sequences of Z<sub>Bpa</sub>-Histag fusion protein

| sequence                                                                                                                                      |
|-----------------------------------------------------------------------------------------------------------------------------------------------|
| CATATGGTAGACAACAAATTCACAAAGAACAACAAACGCGTTCTATGAGATCTAGCATTACCTAACTTAACGAAGAACAACGAAACGCCTTCA                                                 |
| Z-domain <span style="margin-left: 150px;">Amber codon</span>                                                                                 |
| TCCAAAGTTTAAAAGATGACCCAAGCCAAGCGCTAACCTTTTAGCAGAAGCTAAAAAGCTAAATGATGCTCAGGCGCCGAAA                                                            |
| CTGGCGGAGGTGGATCGGGCGGAGGTGGATCA <span style="margin-left: 100px;">CATCATCATCATCATTA</span> <span style="margin-left: 100px;">AACTCGAG</span> |
| (Gly <sub>4</sub> -Ser) <sub>3</sub> Linker <span style="margin-left: 150px;">Histag</span>                                                   |

**Table S2** LOD (pg/mL) of the optimization on the experimental conditions for PSA detection

| Coating antibody<br>μg/mL | IgG@HRP-liposomes |       |       | IgG-*Z-His@HRP-liposomes |        |       |
|---------------------------|-------------------|-------|-------|--------------------------|--------|-------|
|                           | 1:1000            | 1:500 | 1:250 | 1:2000                   | 1:1000 | 1:500 |
| 0.5                       | 2.1               | 2.3   | 3.5   | 0.4                      | 0.4    | 0.6   |
| 1                         | 1.4               | 1.0   | 3.4   | 0.3                      | 0.2    | 0.5   |
| 2                         | 3.8               | 4.1   | 6.2   | 1.0                      | 0.8    | 1.5   |
